# Supplementary material
Source: PubMed Central journal article supplement (PMC5547908)
Supplement: LSHSS-48-16-s005.pdf [file LSHSS-48-16-s005.pdf]

## Online Supplemental Materials, Interactive Book Reading

### **Method: Participants**

Supplemental Tables S1a and S1b provide detailed information about the participant characteristics in each of the four intensity conditions. Table S1a provides percentile scores on clinical tests as well as the percentage of children in each group who scored at or below the 10<sup>th</sup> percentile. A Kruskal–Wallis test is shown for each variable. A significant effect of intensity was not obtained for any of the variables, suggesting that the groups did not differ significantly. However, the probability of the intensity effect was low (.10 or less) for two measures: RIAS Nonverbal IQ and CREVT Expressive Vocabulary. For the RIAS, children in intensities 36 and 48 tended to have lower percentile ranks than children in intensities 12 and 24. For the CREVT, children in intensity 36 tended to have lower percentile ranks than children in the other intensities. Notably, correlation analyses show that these two measures were not significantly correlated with treatment outcomes (see Supplemental Table S3a). Moreover, the condition with the lowest scoring individuals on these measures (i.e., intensity 36) was actually the intensity with the best treatment response.

**Supplemental Table S1a.** Percentile scores for participants in each intensity condition on standardized clinical tests. Results of Kruskal–Wallis test are indicated for each variable.

| Standardized clinical test                                           |           | Intensity 12 | Intensity 24 | Intensity 36 | Intensity 48 |
|----------------------------------------------------------------------|-----------|--------------|--------------|--------------|--------------|
| Age (years;months)<br>$\chi^2(3, N = 27) = 0.48, p = .92$            | <i>M</i>  | 5;10         | 5;9          | 5;8          | 5;8          |
|                                                                      | <i>SD</i> | 0;6          | 0;6          | 0;5          | 0;6          |
|                                                                      | Range     | 5;0–6;5      | 5;1–6;4      | 5;2–6;5      | 5;0–6;5      |
| RIAS Nonverbal IQ<br>$\chi^2(3, N = 27) = 6.35, p = .10$             | <i>M</i>  | 75           | 60           | 43           | 46           |
|                                                                      | <i>SD</i> | 27           | 26           | 21           | 20           |
|                                                                      | Range     | 45–99        | 23–99        | 23–79        | 30–82        |
| % at or below 10 <sup>th</sup> percentile                            |           | 0%           | 0%           | 0%           | 0%           |
| CELF Core Language<br>$\chi^2(3, N = 27) = 3.69, p = .30$            | <i>M</i>  | 2            | 3            | 4            | 5            |
|                                                                      | <i>SD</i> | 2            | 3            | 3            | 3            |
|                                                                      | Range     | 0–5          | 0–7          | 0–10         | 0–8          |
| % at or below 10 <sup>th</sup> percentile                            |           | 100%         | 100%         | 100%         | 100%         |
| Vocabulary: DELV Semantic<br>$\chi^2(3, N = 27) = 0.58, p = .90$     | <i>M</i>  | 9            | 7            | 8            | 10           |
|                                                                      | <i>SD</i> | 11           | 6            | 8            | 8            |
|                                                                      | Range     | 0–25         | 1–16         | 2–25         | 1–25         |
| % at or below 10 <sup>th</sup> percentile                            |           | 60%          | 75%          | 86%          | 71%          |
| Vocabulary: CELF Word Classes<br>$\chi^2(3, N = 27) = 5.50, p = .14$ | <i>M</i>  | 22           | 34           | 21           | 18           |
|                                                                      | <i>SD</i> | 17           | 17           | 16           | 25           |
|                                                                      | Range     | 9–50         | 9–63         | 1–50         | 5–75         |
| % at or below 10 <sup>th</sup> percentile                            |           | 40%          | 13%          | 29%          | 71%          |
| Vocabulary: CREVT Expressive<br>$\chi^2(3, N = 27) = 6.24, p = .10$  | <i>M</i>  | 32           | 24           | 15           | 35           |
|                                                                      | <i>SD</i> | 23           | 15           | 10           | 14           |
|                                                                      | Range     | 10–63        | 1–50         | 5–32         | 18–50        |
| % at or below 10 <sup>th</sup> percentile                            |           | 20%          | 13%          | 43%          | 0%           |

| <b>Standardized clinical test</b>                                           |                                           | <b>Intensity 12</b> | <b>Intensity 24</b> | <b>Intensity 36</b> | <b>Intensity 48</b> |
|-----------------------------------------------------------------------------|-------------------------------------------|---------------------|---------------------|---------------------|---------------------|
| CELF Concepts & Following Directions<br>$\chi^2(3, N = 27) = 1.88, p = .60$ | <i>M</i>                                  | 4                   | 8                   | 7                   | 8                   |
|                                                                             | <i>SD</i>                                 | 4                   | 8                   | 8                   | 6                   |
|                                                                             | Range                                     | 0–9                 | 0–25                | 0–25                | 0–16                |
|                                                                             | % at or below 10 <sup>th</sup> percentile | 100%                | 88%                 | 86%                 | 71%                 |
| CELF Word Structure<br>$\chi^2(3, N = 27) = 1.06, p = .79$                  | <i>M</i>                                  | 8                   | 10                  | 12                  | 12                  |
|                                                                             | <i>SD</i>                                 | 7                   | 9                   | 8                   | 9                   |
|                                                                             | Range                                     | 1–16                | 1–25                | 0–25                | 2–25                |
|                                                                             | % at or below 10 <sup>th</sup> percentile | 60%                 | 63%                 | 43%                 | 43%                 |
| CELF Recalling Sentences<br>$\chi^2(3, N = 27) = 3.90, p = .27$             | <i>M</i>                                  | 3                   | 4                   | 4                   | 9                   |
|                                                                             | <i>SD</i>                                 | 4                   | 3                   | 4                   | 9                   |
|                                                                             | Range                                     | 0–9                 | 0–9                 | 0–9                 | 0–25                |
|                                                                             | % at or below 10 <sup>th</sup> percentile | 100%                | 100%                | 100%                | 71%                 |
| CELF Formulating Sentences<br>$\chi^2(3, N = 27) = 2.45, p = .48$           | <i>M</i>                                  | 8                   | 5                   | 10                  | 9                   |
|                                                                             | <i>SD</i>                                 | 10                  | 5                   | 7                   | 8                   |
|                                                                             | Range                                     | 1–25                | 0–16                | 0–16                | 2–25                |
|                                                                             | % at or below 10 <sup>th</sup> percentile | 80%                 | 88%                 | 57%                 | 86%                 |
| CELF Understanding Spoken Paragraphs<br>$\chi^2(3, N = 27) = 0.20, p = .98$ | <i>M</i>                                  | 7                   | 7                   | 8                   | 7                   |
|                                                                             | <i>SD</i>                                 | 6                   | 8                   | 9                   | 8                   |
|                                                                             | Range                                     | 0–16                | 0–25                | 0–25                | 0–25                |
|                                                                             | % at or below 10 <sup>th</sup> percentile | 80%                 | 88%                 | 71%                 | 86%                 |
| CTOPP Nonword Repetition<br>$\chi^2(3, N = 27) = 0.32, p = .96$             | <i>M</i>                                  | 25                  | 24                  | 17                  | 23                  |
|                                                                             | <i>SD</i>                                 | 29                  | 24                  | 15                  | 21                  |
|                                                                             | Range                                     | 1–75                | 1–63                | 1–37                | 1–63                |
|                                                                             | % at or below 10 <sup>th</sup> percentile | 40%                 | 50%                 | 43%                 | 43%                 |
| CTOPP Phonological Memory<br>$\chi^2(3, N = 27) = 3.43, p = .33$            | <i>M</i>                                  | 7                   | 16                  | 9                   | 28                  |
|                                                                             | <i>SD</i>                                 | 6                   | 15                  | 6                   | 26                  |
|                                                                             | Range                                     | 1–16                | 1–37                | 1–16                | 1–75                |
|                                                                             | % at or below 10 <sup>th</sup> percentile | 80%                 | 50%                 | 57%                 | 29%                 |
| CTOPP Phonological Awareness<br>$\chi^2(3, N = 27) = 4.60, p = .20$         | <i>M</i>                                  | 7                   | 13                  | 5                   | 6                   |
|                                                                             | <i>SD</i>                                 | 10                  | 10                  | 4                   | 7                   |
|                                                                             | Range                                     | 1–25                | 3–30                | 1–12                | 2–21                |
|                                                                             | % at or below 10 <sup>th</sup> percentile | 80%                 | 50%                 | 86%                 | 86%                 |
| GFTA<br>$\chi^2(3, N = 27) = 2.06, p = .56$                                 | <i>M</i>                                  | 36                  | 22                  | 30                  | 36                  |
|                                                                             | <i>SD</i>                                 | 22                  | 18                  | 24                  | 21                  |
|                                                                             | Range                                     | 10–65               | 1–53                | 1–67                | 5–67                |
|                                                                             | % at or below 10 <sup>th</sup> percentile | 20%                 | 25%                 | 14%                 | 14%                 |

*Note.* RIAS = Reynolds Intellectual Assessment Scale (Reynolds & Kamphaus, 2003); CELF = Clinical Evaluation of Language Fundamentals–Fourth Edition (Semel et al., 2003); DELV = Diagnostic Evaluation of Language Variation (Seymour, Roeper, de Villers, & de Villers, 2005); CREVT = Comprehensive Receptive and Expressive Vocabulary Test–Third Edition (Wallace & Hammill, 2013); CTOPP = Comprehensive Test of Phonological Processing–Second Edition (Wagner, Torgesen, Rashotte, & Pearson, 2013); GFTA = Goldman-Fristoe Test of Articulation–Second Edition (Goldman & Fristoe, 2000).
