# Supplementary material
Source: PubMed Central journal article supplement (PMC5547908)
Supplement: LSHSS-48-16-s007.pdf [file LSHSS-48-16-s007.pdf]

### ***Method: Treatment Materials***

Because items were randomly assigned to treatment or a no-treatment control condition for each child, each word was used in treatment for 13 children. One set of words was used for a fourteenth child but this child did not complete the definition post-test. To examine item effects, the percentage of children (out of 13) who defined the target word correctly at post-test when the word received treatment was computed. These values are shown in the second column of Supplemental Table S2. These values were significantly correlated with those reported by Justice and colleagues (2005, Table 4, summed post-test scores) for the subset of 30 words in Justice's elaborated treatment condition, which is similar to the treatment form in the current study,  $r(30) = 0.72$ ,  $p < .001$ ,  $r^2 = 0.52$ . For the current study, the percentage of children (out of 13) who defined untreated control words correctly also was computed to use as a reference point in interpreting learning of the treated items. On average, 0% (range = 0–23%) of children defined untreated control words correctly. Treated words were then classified at post-test by those that were learned beyond the *range* of the control words (i.e., more than 0–23% of children learned the word). These words are considered to be the frequently learned words (17% of treated words) and are shaded in green in Supplemental Table S2. Treated words that were learned beyond the *average* of the control words (i.e., by more than 0% of children) also are noted and are shaded in blue in Supplemental Table S2 (53% of treated words). Finally, treated words that were never learned (30% of treated words) are shaded in orange in Supplemental Table S2.

The remaining columns of Supplemental Table S2 show the characteristics of the materials used to treat each target word. This includes the number of words in each treatment exposure as well as the average frequency of those words from the Storkel and Hoover (2010) online calculator based on word frequency in child corpora of spoken American English. Possible associations between the percentage of children who learned a word and exposure variables (shown in Supplemental Table S2) and word characteristics (phonotactic probability, neighborhood density) were explored through correlation analyses. However, no significant effects were obtained. The only potentially promising observation was that verbs were rarely present in the frequently learned words category: 8% frequently learned (green shading), 52% learned (blue shading), 40% never learned (orange shading). Likewise, the majority of nouns fell in the middle/learned category: 13% frequently learned (green shading), 69% learned (blue shading), 19% never learned (orange shading). Adjectives were relatively equally distributed across learning categories: 32% frequently learned (green shading), 42% learned (blue shading), 26% never learned (orange shading). Overall, these results should be viewed with caution because it is likely that the nature of this study may not lend itself to a thorough understanding of word or exposure effects. That is, some children received treatment in less effective conditions (e.g., intensity 12), limiting the number of words learned.

**Supplemental Table S2.** *Characteristics of words learned during treatment based on correct definition scores at post-treatment testing.*

| Target Word | %Children Defined Word Correctly at Post | Classification of Word at Post | Book Title                     | Part of Speech | Frequency of Word | # of Words in Definition | Average Frequency of Words in Definition | # of Words in Synonym | Frequency of Synonym | # of Words in Context Sentence | Average Frequency of Words in Context Sentence | # of Words in Book Text Sentence | Average Frequency of Words in Book Text Sentence |
|-------------|------------------------------------------|--------------------------------|--------------------------------|----------------|-------------------|--------------------------|------------------------------------------|-----------------------|----------------------|--------------------------------|------------------------------------------------|----------------------------------|--------------------------------------------------|
| pouted      | 46%                                      | Above Control Range (0-23%)    | Book! Book! Book!              | verb           | 0                 | 8                        | 1952                                     | 1                     | 0                    | 9                              | 313                                            | 3                                | 60                                               |
| haddock     | 38%                                      | Above Control Range (0-23%)    | The Bear Under the Stairs      | noun           | 0                 | 8                        | 134                                      | 1                     | 217                  | 11                             | 1501                                           | 7                                | 20                                               |
| horrified   | 38%                                      | Above Control Range (0-23%)    | The Caterpillar That Roared    | adjective      | 0                 | 5                        | 107                                      | 1                     | 7                    | 11                             | 1563                                           | 3                                | 0                                                |
| tight       | 38%                                      | Above Control Range (0-23%)    | The Bear Under the Stairs      | adjective      | 58                | 5                        | 275                                      | 1                     | 94                   | 13                             | 232                                            | 20                               | 731                                              |
| crept       | 31%                                      | Above Control Range (0-23%)    | The Bear Under the Stairs      | verb           | 1                 | 6                        | 143                                      | 1                     | 4                    | 11                             | 1725                                           | 5                                | 1311                                             |
| flashing    | 31%                                      | Above Control Range (0-23%)    | What Do You Do With a Kangaroo | adjective      | 12                | 8                        | 446                                      | 1                     | 1                    | 9                              | 990                                            | 27                               | 1075                                             |
| gulp        | 31%                                      | Above Control Range (0-23%)    | Swimmy                         | noun           | 0                 | 9                        | 779                                      | 1                     | 8                    | 13                             | 1779                                           | 10                               | 2954                                             |
| invisible   | 31%                                      | Above Control Range (0-23%)    | Swimmy                         | adjective      | 18                | 5                        | 295                                      | 1                     | 125                  | 15                             | 1307                                           | 7                                | 123                                              |
| overjoyed   | 31%                                      | Above Control Range (0-23%)    | Imogene's Antlers              | adjective      | 0                 | 5                        | 321                                      | 1                     | 10                   | 10                             | 1805                                           | 16                               | 2088                                             |
| worn        | 31%                                      | Above Control Range (0-23%)    | What Do You Do With a Kangaroo | adjective      | 8                 | 7                        | 173                                      | 1                     | 9                    | 9                              | 240                                            | 22                               | 543                                              |

| Target Word | %Children Defined Word Correctly at Post | Classification of Word at Post | Book Title                     | Part of Speech | Frequency of Word | # of Words in Definition | Average Frequency of Words in Definition | # of Words in Synonym | Frequency of Synonym | # of Words in Context Sentence | Average Frequency of Words in Context Sentence | # of Words in Book Text Sentence | Average Frequency of Words in Book Text Sentence |
|-------------|------------------------------------------|--------------------------------|--------------------------------|----------------|-------------------|--------------------------|------------------------------------------|-----------------------|----------------------|--------------------------------|------------------------------------------------|----------------------------------|--------------------------------------------------|
| damp        | 23%                                      | Above Mean Control (0%)        | Harry and the Terrible Whatzit | adjective      | 8                 | 4                        | 41                                       | 1                     | 1                    | 9                              | 494                                            | 12                               | 486                                              |
| glared      | 23%                                      | Above Mean Control (0%)        | Imogene's Antlers              | verb           | 0                 | 8                        | 2049                                     | 1                     | 1                    | 12                             | 669                                            | 6                                | 195                                              |
| hooves      | 23%                                      | Above Mean Control (0%)        | Otis                           | noun           | 0                 | 11                       | 202                                      | 1                     | 189                  | 12                             | 1646                                           | 20                               | 807                                              |
| swaying     | 23%                                      | Above Mean Control (0%)        | Swimmy                         | verb           | 0                 | 8                        | 547                                      | 1                     | 7                    | 10                             | 175                                            | 13                               | 178                                              |
| clamor      | 15%                                      | Above Mean Control (0%)        | Possum and the Peeper          | noun           | 0                 | 9                        | 1666                                     | 1                     | 107                  | 11                             | 579                                            | 10                               | 985                                              |
| furnace     | 15%                                      | Above Mean Control (0%)        | Harry and the Terrible Whatzit | noun           | 13                | 8                        | 1304                                     | 1                     | 42                   | 11                             | 270                                            | 6                                | 72                                               |
| gathered    | 15%                                      | Above Mean Control (0%)        | Book! Book! Book!              | verb           | 2                 | 7                        | 1983                                     | 1                     | 3                    | 12                             | 3105                                           | 21                               | 376                                              |
| midday      | 15%                                      | Above Mean Control (0%)        | Swimmy                         | noun           | 0                 | 6                        | 375                                      | 1                     | 204                  | 11                             | 1295                                           | 19                               | 593                                              |
| racket      | 15%                                      | Above Mean Control (0%)        | Possum and the Peeper          | noun           | 0                 | 6                        | 52                                       | 1                     | 8                    | 12                             | 274                                            | 16                               | 1063                                             |
| ripe        | 15%                                      | Above Mean Control (0%)        | Otis                           | adjective      | 9                 | 8                        | 537                                      | 1                     | 529                  | 9                              | 1638                                           | 24                               | 257                                              |
| sidelines   | 15%                                      | Above Mean Control (0%)        | Otis                           | noun           | 0                 | 10                       | 49                                       | 2                     | 107                  | 14                             | 196                                            | 14                               | 113                                              |
| spotless    | 15%                                      | Above Mean Control (0%)        | Otis                           | adjective      | 0                 | 5                        | 471                                      | 1                     | 624                  | 11                             | 507                                            | 9                                | 315                                              |
| squawked    | 15%                                      | Above Mean Control (0%)        | Book! Book! Book!              | verb           | 0                 | 5                        | 370                                      | 1                     | 10                   | 13                             | 1624                                           | 13                               | 358                                              |
| swat        | 15%                                      | Above Mean Control (0%)        | Harry and the Terrible Whatzit | verb           | 6                 | 10                       | 396                                      | 1                     | 91                   | 12                             | 1845                                           | 9                                | 205                                              |
| swift       | 15%                                      | Above Mean Control (0%)        | Swimmy                         | adjective      | 0                 | 5                        | 192                                      | 1                     | 316                  | 12                             | 358                                            | 16                               | 827                                              |
| tailor      | 15%                                      | Above Mean Control (0%)        | What Do You Do With a Kangaroo | noun           | 0                 | 7                        | 244                                      | 1                     | 2                    | 10                             | 795                                            | 16                               | 1030                                             |
| awful       | 8%                                       | Above Mean Control (0%)        | The Bear Under the Stairs      | adjective      | 26                | 5                        | 772                                      | 1                     | 354                  | 15                             | 438                                            | 6                                | 855                                              |
| gloomy      | 8%                                       | Above Mean Control (0%)        | Harry and the Terrible Whatzit | adjective      | 0                 | 4                        | 2047                                     | 1                     | 254                  | 10                             | 125                                            | 6                                | 553                                              |
| grumbling   | 8%                                       | Above Mean Control (0%)        | Possum and the Peeper          | verb           | 0                 | 5                        | 20                                       | 1                     | 0                    | 11                             | 2859                                           | 14                               | 452                                              |
| heaved      | 8%                                       | Above Mean Control (0%)        | Book! Book! Book!              | verb           | 0                 | 6                        | 1529                                     | 1                     | 12                   | 10                             | 621                                            | 5                                | 1                                                |
| marsh       | 8%                                       | Above Mean Control (0%)        | Possum and the Peeper          | noun           | 1                 | 9                        | 90                                       | 1                     | 1                    | 12                             | 1530                                           | 15                               | 1863                                             |
| marvel      | 8%                                       | Above Mean Control (0%)        | Swimmy                         | noun           | 0                 | 9                        | 259                                      | 1                     | 86                   | 14                             | 385                                            | 19                               | 236                                              |
| nervous     | 8%                                       | Above Mean Control (0%)        | Shy Charles                    | adjective      | 8                 | 5                        | 80                                       | 1                     | 1                    | 13                             | 716                                            | 7                                | 2085                                             |
| noticed     | 8%                                       | Above Mean Control (0%)        | The Bear Under the Stairs      | verb           | 2                 | 7                        | 1848                                     | 1                     | 5241                 | 9                              | 241                                            | 11                               | 143                                              |
| ripples     | 8%                                       | Above Mean Control (0%)        | The Caterpillar That Roared    | noun           | 0                 | 5                        | 1167                                     | 1                     | 8                    | 9                              | 877                                            | 10                               | 996                                              |
| ruffle      | 8%                                       | Above Mean Control (0%)        | Book! Book! Book!              | verb           | 0                 | 10                       | 1594                                     | 1                     | 8                    | 10                             | 1349                                           | 11                               | 68                                               |
| scarlet     | 8%                                       | Above Mean Control (0%)        | Shy Charles                    | noun           | 9                 | 5                        | 343                                      | 1                     | 365                  | 11                             | 289                                            | 7                                | 25                                               |
| snuggled    | 8%                                       | Above Mean Control (0%)        | The Caterpillar That Roared    | verb           | 0                 | 9                        | 543                                      | 1                     | 1                    | 11                             | 1226                                           | 15                               | 729                                              |
| stale       | 8%                                       | Above Mean Control (0%)        | What Do You Do With a Kangaroo | adjective      | 9                 | 6                        | 4207                                     | 1                     | 513                  | 13                             | 525                                            | 16                               | 952                                              |
| swung       | 8%                                       | Above Mean Control (0%)        | Harry and the Terrible Whatzit | verb           | 2                 | 8                        | 551                                      | 1                     | 2                    | 10                             | 223                                            | 5                                | 390                                              |
| wandered    | 8%                                       | Above Mean Control (0%)        | Imogene's Antlers              | verb           | 1                 | 7                        | 848                                      | 2                     | 58                   | 12                             | 353                                            | 4                                | 79                                               |
| whinnied    | 8%                                       | Above Mean Control (0%)        | Book! Book! Book!              | verb           | 0                 | 9                        | 1613                                     | 1                     | 0                    | 10                             | 774                                            | 5                                | 33                                               |

| Target Word | % Children Defined Word Correctly at Post | Classification of Word at Post | Book Title                     | Part of Speech | Frequency of Word | # of Words in Definition | Average Frequency of Words in Definition | # of Words in Synonym | Frequency of Synonym | # of Words in Context Sentence | Average Frequency of Words in Context Sentence | # of Words in Book Text Sentence | Average Frequency of Words in Book Text Sentence |
|-------------|-------------------------------------------|--------------------------------|--------------------------------|----------------|-------------------|--------------------------|------------------------------------------|-----------------------|----------------------|--------------------------------|------------------------------------------------|----------------------------------|--------------------------------------------------|
| advice      | 0%                                        | Never Learned (0%)             | Imogene's Antlers              | noun           | 0                 | 9                        | 1296                                     | 1                     | 624                  | 12                             | 1575                                           | 6                                | 1621                                             |
| decided     | 0%                                        | Never Learned (0%)             | The Bear Under the Stairs      | verb           | 13                | 5                        | 4799                                     | 1                     | 4                    | 9                              | 626                                            | 14                               | 262                                              |
| discovered  | 0%                                        | Never Learned (0%)             | Harry and the Terrible Whatzit | verb           | 0                 | 7                        | 771                                      | 1                     | 2                    | 11                             | 266                                            | 15                               | 1155                                             |
| embarrassed | 0%                                        | Never Learned (0%)             | Shy Charles                    | adjective      | 1                 | 6                        | 29                                       | 1                     | 6                    | 13                             | 778                                            | 6                                | 4100                                             |
| frayed      | 0%                                        | Never Learned (0%)             | What Do You Do With a Kangaroo | adjective      | 0                 | 7                        | 980                                      | 1                     | 22                   | 11                             | 547                                            | 21                               | 33                                               |
| gaze        | 0%                                        | Never Learned (0%)             | The Caterpillar That Roared    | verb           | 0                 | 8                        | 2240                                     | 1                     | 1                    | 14                             | 598                                            | 22                               | 1841                                             |
| hauled      | 0%                                        | Never Learned (0%)             | Otis                           | verb           | 58                | 5                        | 101                                      | 1                     | 8                    | 12                             | 2077                                           | 24                               | 167                                              |
| murmured    | 0%                                        | Never Learned (0%)             | Shy Charles                    | verb           | 0                 | 8                        | 89                                       | 1                     | 1                    | 11                             | 363                                            | 10                               | 1287                                             |
| peering     | 0%                                        | Never Learned (0%)             | Possum and the Peeper          | verb           | 0                 | 8                        | 1313                                     | 1                     | 16                   | 11                             | 1550                                           | 15                               | 194                                              |
| prodded     | 0%                                        | Never Learned (0%)             | Imogene's Antlers              | verb           | 0                 | 6                        | 334                                      | 1                     | 82                   | 11                             | 216                                            | 9                                | 28                                               |
| rare        | 0%                                        | Never Learned (0%)             | Imogene's Antlers              | adjective      | 1                 | 5                        | 2758                                     | 2                     | 4987                 | 11                             | 1744                                           | 20                               | 736                                              |
| silky       | 0%                                        | Never Learned (0%)             | Otis                           | adjective      | 9                 | 8                        | 1340                                     | 1                     | 23                   | 11                             | 1272                                           | 9                                | 77                                               |
| smooth      | 0%                                        | Never Learned (0%)             | What Do You Do With a Kangaroo | adjective      | 23                | 4                        | 159                                      | 1                     | 411                  | 10                             | 530                                            | 22                               | 1427                                             |
| squinting   | 0%                                        | Never Learned (0%)             | Possum and the Peeper          | verb           | 0                 | 7                        | 427                                      | 1                     | 9                    | 11                             | 464                                            | 12                               | 86                                               |
| success     | 0%                                        | Never Learned (0%)             | Shy Charles                    | noun           | 0                 | 9                        | 1000                                     | 1                     | 0                    | 12                             | 186                                            | 5                                | 6324                                             |
| surface     | 0%                                        | Never Learned (0%)             | The Caterpillar That Roared    | noun           | 0                 | 5                        | 659                                      | 1                     | 440                  | 12                             | 548                                            | 10                               | 70                                               |
| trembled    | 0%                                        | Never Learned (0%)             | Shy Charles                    | verb           | 0                 | 9                        | 143                                      | 1                     | 1                    | 10                             | 509                                            | 6                                | 4                                                |
| twitch      | 0%                                        | Never Learned (0%)             | The Caterpillar That Roared    | verb           | 0                 | 5                        | 91                                       | 1                     | 16                   | 11                             | 1217                                           | 23                               | 598                                              |
