# Supplementary material
Source: PubMed Central journal article supplement (PMC5547908)
Supplement: LSHSS-48-16-s008.pdf [file LSHSS-48-16-s008.pdf]

**Results: Variability in Response to Treatment—Pretreatment characteristics associated with post-treatment definition scores**

To examine potential pre-treatment predictors of treatment response, correlations between pre-treatment measures (i.e., age and all standardized test scores), early treatment performance (i.e., number of words named correctly at the first naming test) and treatment outcome (i.e., number of treated words defined correctly post-treatment) were examined for the 21 children in the intensities that produced a treatment response (i.e., intensities 24, 36, and 48). The full set of correlations is shown in Table S3a with the first column of correlations addressing the research question. The remaining columns show correlations among measures. Significant and marginally significant correlations are marked. Significant effects are described in the article. Two measures showed promising but non-significant correlations: the overall CTOPP phonological memory score [ $r(21) = 0.42, p = .06, r^2 = 0.18$ ] and the treated word score at the first naming test during treatment [ $r(21) = 0.37, p = .10, r^2 = 0.14$ ]. Here, children with higher phonological memory scores or greater treated words named correctly early in treatment tended to achieve higher scores on the post-treatment definition test than children with lower phonological memory scores or fewer treated words named correctly early in treatment.

**Supplemental Table S3a.** Correlations among measures.

|                                                         | 1    | 2    | 3    | 4    | 5    | 6    | 7    | 8 | 9 | 10 | 11 | 12 | 13 | 14 | 15 | 16 |
|---------------------------------------------------------|------|------|------|------|------|------|------|---|---|----|----|----|----|----|----|----|
| 1. Treated Word Score on Post-Treatment Definition Test | 1.00 |      |      |      |      |      |      |   |   |    |    |    |    |    |    |    |
| 2. Age (in months)                                      | .14  | 1.00 |      |      |      |      |      |   |   |    |    |    |    |    |    |    |
| 3. RIAS Nonverbal IQ                                    | .11  | -.29 | 1.00 |      |      |      |      |   |   |    |    |    |    |    |    |    |
| 4. CELF Core Language                                   | .25  | -.06 | -.16 | 1.00 |      |      |      |   |   |    |    |    |    |    |    |    |
| 5. Vocabulary: DELV Semantic                            | .52* | .11  | .03  | .50* | 1.00 |      |      |   |   |    |    |    |    |    |    |    |
| 6. Vocabulary: CELF Word Classes                        | -.14 | -.34 | .40~ | .17  | .05  | 1.00 |      |   |   |    |    |    |    |    |    |    |
| 7. Vocabulary: CREVT Expressive                         | .17  | .23  | .12  | .23  | .01  | -.16 | 1.00 |   |   |    |    |    |    |    |    |    |

|                                             | 1    | 2    | 3    | 4     | 5     | 6    | 7     | 8     | 9     | 10    | 11   | 12   | 13   | 14   | 15   | 16   |
|---------------------------------------------|------|------|------|-------|-------|------|-------|-------|-------|-------|------|------|------|------|------|------|
| 8. CELF Concepts & Following Directions     | .12  | -.02 | .09  | .76** | .42~  | .31  | .22   | 1.00  |       |       |      |      |      |      |      |      |
| 9. CELF Word Structure                      | .27  | .09  | -.17 | .72** | .03   | -.12 | .28   | .33   | 1.00  |       |      |      |      |      |      |      |
| 10. CELF Recalling Sentences                | .33  | 0.00 | -.03 | .69** | .76** | .35  | .15   | .69** | .10   | 1.00  |      |      |      |      |      |      |
| 11. CELF Formulating Sentences              | .09  | -.15 | -.36 | .73** | .28   | -.15 | .07   | .19   | .73** | .21   | 1.00 |      |      |      |      |      |
| 12. CELF Understanding Spoken Paragraphs    | .24  | -.33 | .26  | .40~  | .50*  | .03  | .04   | .30   | .17   | .45*  | .23  | 1.00 |      |      |      |      |
| 13. CTOPP Nonword Repetition                | .44* | .43~ | .20  | .18   | .15   | -.09 | .47*  | .42~  | .15   | .39~  | -.30 | .19  | 1.00 |      |      |      |
| 14. CTOPP Phonological Memory               | .42~ | .52* | .12  | .42~  | .48*  | .02  | .41~  | .59** | .14   | .68** | -.10 | .16  | .84* | 1.00 |      |      |
| 15. CTOPP Phonological Awareness            | .48* | .38~ | -.09 | .26   | .16   | .10  | .19   | .30   | .25   | .22   | -.02 | .05  | .38~ | .36  | 1.00 |      |
| 16. GFTA                                    | .34  | .37~ | -.08 | .31   | .02   | -.02 | .57** | .25   | .44*  | .19   | .10  | -.16 | .59* | .54* | .21  | 1.00 |
| 17. Treated Word Score at First Naming Test | .37~ | .25  | -.10 | .47*  | .47*  | -.36 | .44*  | .26   | .44*  | .30   | .40~ | .13  | .22  | .38~ | .09  | .41~ |

*Note.* RIAS = Reynolds Intellectual Assessment Scale (Reynolds & Kamphaus, 2003); CELF = Clinical Evaluation of Language Fundamentals–Fourth Edition (Semel et al., 2003); DELV = Diagnostic Evaluation of Language Variation (Seymour, Roeper, de Villers, & de Villers, 2005); CREVT = Comprehensive Receptive and Expressive Vocabulary Test–Third Edition (Wallace & Hammill, 2013); CTOPP = Comprehensive Test of Phonological Processing–Second Edition (Wagner, Torgesen, Rashotte, & Pearson, 2013); GFTA = Goldman-Fristoe Test of Articulation–Second Edition (Goldman & Fristoe, 2000).

\*\* $p < .01$ , \* $p < .05$ , ~  $.05 \leq p \leq .10$ . Standard scores were used for items 3–16.
